# Supplementary material for: Telomerase activity promotes osteoblast differentiation by modulating IGF-signaling pathway
Source: PubMed Central journal article supplement (PMC4602053; doi:10.1007/s10522-015-9596-6), 2015-08-11
Supplement: 10522_2015_9596_MOESM2_ESM.pdf [file 10522_2015_9596_MOESM2_ESM.pdf]

**Table. S1. List of Differentially Expressed Genes IGF signalling pathway related genes by Telomerase Over-expression in hMSC**

| <b>IGF Signaling</b>      |                            |                                                                                                |                    |
|---------------------------|----------------------------|------------------------------------------------------------------------------------------------|--------------------|
| <i>Accession Number</i>   | <i>Gene Symbol</i>         | <i>Gene Name</i>                                                                               | <i>Fold Change</i> |
| NM_006939.2               | SOS2                       | Son of sevenless homolog 2                                                                     | 4,49               |
| NM_003161.3               | RPS6KB1                    | Ribosomal protein S6, kinase, 70kDa, polypeptide 1                                             | 4,22               |
| NM_002645.2               | PIK3C2A                    | Phosphatidylinositol-4-phosphate 3-kinase, catalytic subunit type 2 alpha                      | 4,02               |
| NM_002731.2               | PRKACB                     | Protein kinase, cAMP dependent, catalytic, beta                                                | 3,37               |
| NM_002834.3               | PTPN11                     | Protein tyrosine phosphatase, non-receptor type 11                                             | 3,34               |
| NM_006154.3               | NEDD4                      | Neural precursor cell expressed, developmentally down regulated 4, E3 ubiquitin protein ligase | 3,12               |
| NM_002740.5               | PRKCI                      | Protein kinase C, iota                                                                         | 2,93               |
| NM_005465.4               | AKT3                       | v-akt murine thymoma viral oncogene homolog 3                                                  | 2,7                |
| NM_181523.2               | PIK3R1                     | Phosphoinositide-3-kinase, regulatory subunit 1                                                | 2,6                |
| NM_006218.2               | PIK3CA                     | Phosphatidylinositol-4, 5-bisphosphate 3-kinase, catalytic subunit alpha                       | 2,43               |
| NM_002890.2               | RASA1                      | RAS p21 protein activator (GTPase activating protein) 1                                        | 2,21               |
| NM_000596.2               | IGFBP1                     | Insulin-like growth factor binding protein 1                                                   | 1,79               |
| NM_000597.2               | IGFBP2                     | Insulin like growth factor binding protein 2, 36kDa                                            | -5,79              |
| NM_001901.2               | CTGF                       | Connective tissue growth factor                                                                | -3,75              |
| NM_003749.2               | IRS2                       | Insulin receptor substrate 2                                                                   | -1,9               |
| NM_001552.2               | IGFBP4                     | Insulin like growth factor binding protein 4                                                   | -1,81              |
| NM_003405.3               | YWHAH                      | Tyrosin 3-monooxygenase/tryptophan 5-monooxygenase activation protein. eta                     | -1,65              |
| NM_000599.3               | IGFBP5                     | Insulin like growth factor binding protein 5                                                   | -1,65              |
| <b>PI3K/AKT Signaling</b> |                            |                                                                                                |                    |
| <i>Accession Number</i>   | <i>Gene Symbol</i>         | <i>Gene Name</i>                                                                               | <i>Fold Change</i> |
| NM_006939.2               | SOS2                       | Son of sevenless homolog 2                                                                     | 4,49               |
| NM_003161.3               | RPS6KB1                    | Ribosomal protein S6, kinase, 70kDa, polypeptide 1                                             | 4,22               |
| NM_000885.4               | ITGA4                      | Integrin alpha 4 (antigen CD49D)                                                               | 4,03               |
| NM_005348.3               | HSP90AA1                   | Heat shock protein 90kDa alpha (cytosolic), class A, member 1                                  | 3,62               |
| NM_005923.3               | MAP3K5                     | Mitogen activated protein kinase kinase 5                                                      | 3,29               |
| NM_002718.4               | PPP2R3A (includes EG:5523) | Protein phosphatase 2, regulatory subunit B, alpha                                             | 3,17               |
| NM_002039.3               | GAB1                       | GAB 2 associated binding protein 1                                                             | 2,94               |
| NM_001968.3               | EIF4E                      | Eukaryotic translation initiation factor 4E                                                    | 2,8                |
| NM_005465.4               | AKT3                       | v-akt murine thymoma viral oncogene homolog 3                                                  | 2,7                |
| NM_181523.2               | PIK3R1                     | Phosphoinositide-3-kinase, regulatory subunit 1                                                | 2,6                |

|             |          |                                                                                 |       |
|-------------|----------|---------------------------------------------------------------------------------|-------|
| NM_006218.2 | PIK3CA   | Phosphatidyl inositol-4, 5-bi-phosphate 3-kinase, catalytic subunit alpha       | 2,43  |
| NM_002502.5 | NFKB2    | Nuclear factor of kappa light polypeptide gene enhancer in B cells 2 (p49/p100) | 2,25  |
| NM_002203.3 | ITGA2    | Interin alpha 2 (CD49B, alpha 2 subunit of VLA-2 receptor)                      | 2,2   |
| NM_004987.5 | LIMS1    | LIM and senescent cell antigen -like domains 1                                  | 2,14  |
| NM_004095.3 | EIF4EBP1 | Eukaryotic translation initiation factor 4E binding protein 1                   | -2,09 |
| NM_002719.3 | PPP2R5C  | Protein phosphatase 2, regulatory subunit B, gamma                              | -2,71 |

### PTEN Signaling

| <i>Accession Number</i> | <i>Gene Symbol</i> | <i>Gene Name</i>                                                                | <i>Fold Change</i> |
|-------------------------|--------------------|---------------------------------------------------------------------------------|--------------------|
| NM_006939.2             | SOS2               | Son of sevenless homolog 2                                                      | 4,49               |
| NM_003161.3             | RPS6KB1            | Ribosomal protein S6 kinase, 70kDa, polypeptide 1                               | 4,22               |
| NM_000885.4             | ITGA4              | Integrin alpha 4 (antigen CD49D)                                                | 4,03               |
| NM_005228.3             | EGFR               | Epidermal growth factor receptor                                                | 4,02               |
| NM_017742.4             | ZCCHC2             | Zinc finger CCHC domain containing 2                                            | 2,9                |
| NM_006206.4             | PDGFRA             | Platelet derived growth factor receptor alpha polypeptide                       | 2,89               |
| NM_005465.4             | AKT3               | v-akt murine thymoma viral oncogene homolog 3                                   | 2,7                |
| NM_181523.2             | PIK3R1             | Phosphoinositide-3-kinase, regulatory subunit 1                                 | 2,6                |
| NM_006218.2             | PIK3CA             | Phosphatidyl inositol-4, 5-bi-phosphate 3-kinase, catalytic subunit alpha       | 2,43               |
| NM_002502.5             | NFKB2              | Nuclear factor of kappa light polypeptide gene enhancer in B cells 2 (p49/p100) | 2,25               |
| NM_002203.3             | ITGA2              | Interin alpha 2 (CD49B, alpha 2 subunit of VLA-2 receptor)                      | 2,2                |
| NM_005249.4             | FOXP1              | Fork head box G1                                                                | 1,98               |
| NM_004346.3             | CASP3              | Caspase 3, apoptosis related cystein peptidase                                  | 1,93               |
| NM_001278.3             | CHUK               | Conserve helix loop helix ubiquitous kinase                                     | 1,91               |
| NM_000314.4             | PTEN               | Phosphatase and tensin homolog                                                  | 1,74               |
| NM_000163.4             | GHR                | Growth hormone receptor                                                         | -2,88              |
| NM_002609.3             | PDGFRB             | Platelet derive growth factor receptor, beta polypeptide                        | -2,14              |
| NM_003405.3             | YWHAH              | Tyrosin 3-monooxygenase/tryptophan 5-monooxygenase activation protein. eta      | -1,65              |
